# Supplementary material for: The Balance protocol: a pragmatic weight gain prevention randomized controlled trial for medically vulnerable patients within primary care
Source: Springer Nature journal article supplement (doi:10.1186/s12889-019-6926-7), 2019-05-17
Supplement: MOESM1 [file 16731962]

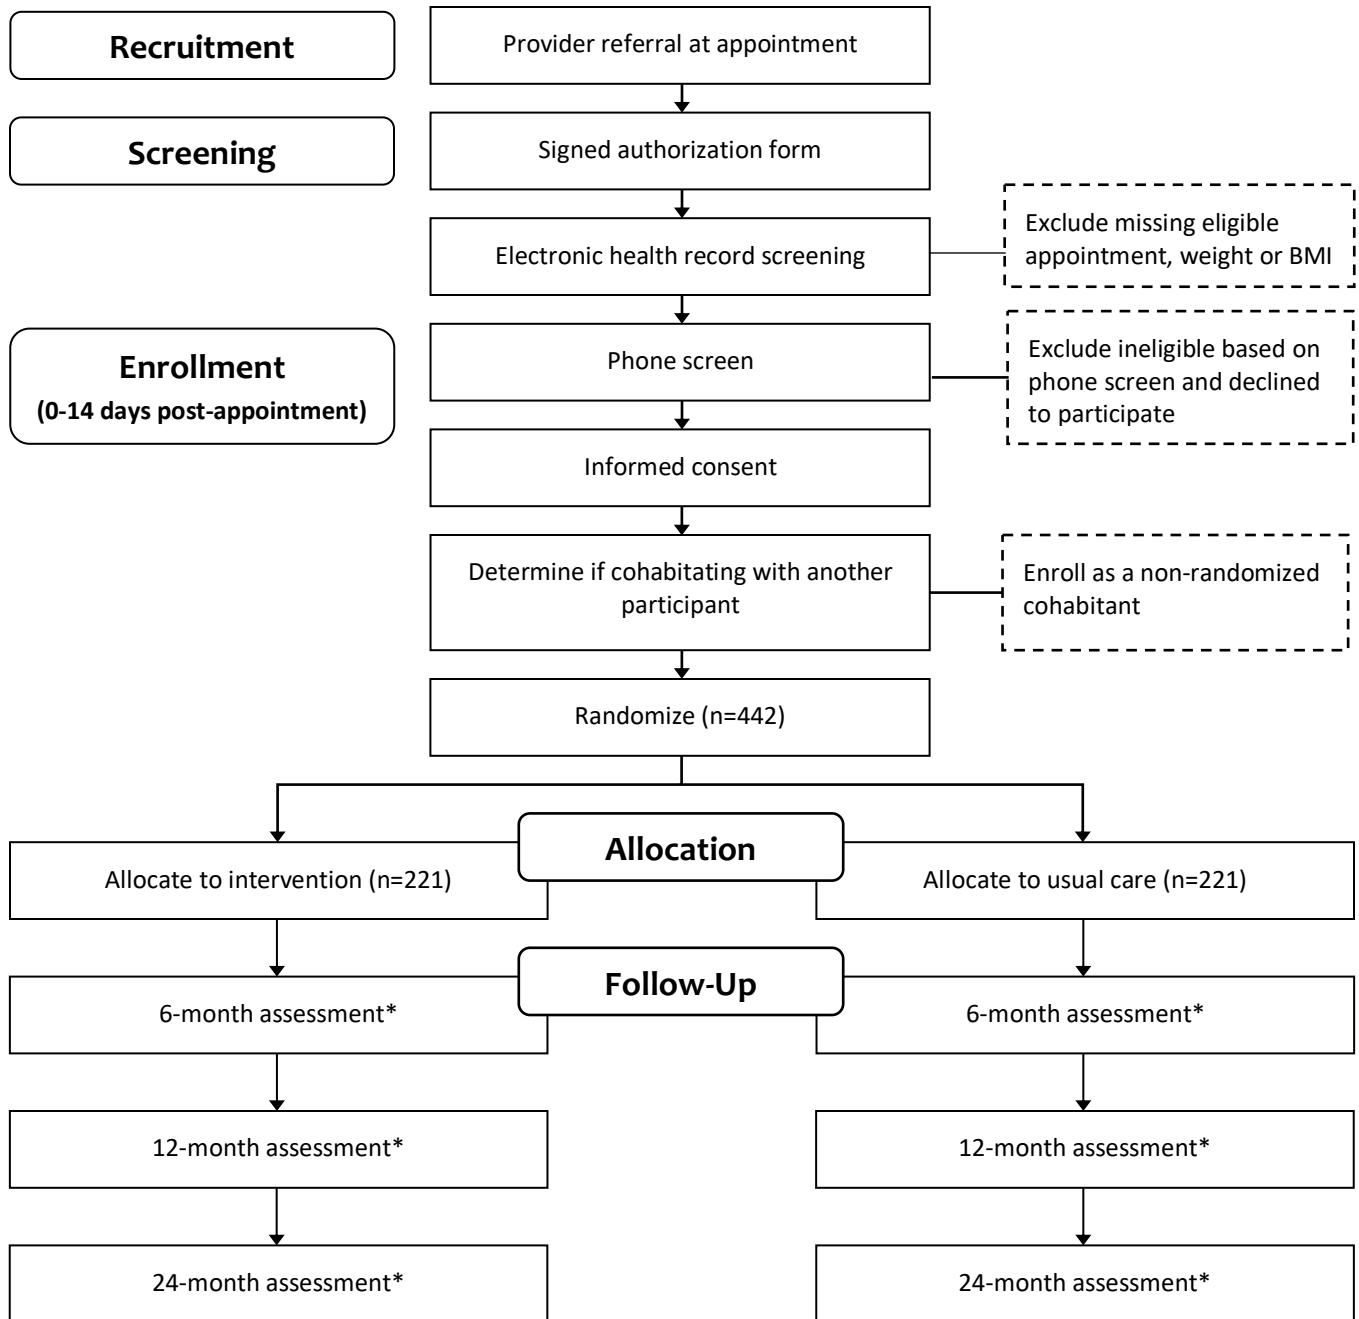

\* Follow-up assessment data will be collected from the patients' electronic medical records after 24-months and analyzed with respect to the specified time points.
